# Supplementary material
Source: MDPI journal article supplement (https://www.mdpi.com/2076-0760/11/1/28)
Supplement: s1 [file s1]

**Table S1. Location, Period, and Sample Size of the Survey**

|                 | Place                            | Period          | Total (Valid) |
|-----------------|----------------------------------|-----------------|---------------|
| Eastern China   | Fangshan District of Beijing     | 2016.01         | 202 (202)     |
| Northeast China | Chaoyang City, Liaoning Province | 2014.06         | 238 (238)     |
| Central China   | Shiyan City, Hubei Province      | 2015.09-2016.01 | 178 (178)     |
|                 | Jiujiang City, Jiangxi Province  | 2015.01         | 185 (185)     |
|                 | Lu'an City, Anhui Province       | 2015.07         | 182 (126)     |
| Western China   | Wuwei City, Gansu Province       | 2014.08         | 52 (52)       |
|                 | Ankang City, Shanxi Province     | 2014.08         | 153 (153)     |
| Total           |                                  |                 | 1190 (1134)   |

**Table S2. List of Variables**

| Variable                    | Description                                                                                                   | Values                                                                                                             |
|-----------------------------|---------------------------------------------------------------------------------------------------------------|--------------------------------------------------------------------------------------------------------------------|
| <b>Endogenous variables</b> |                                                                                                               |                                                                                                                    |
| Psychological well-being    | Measured by the composite score of twelve items:                                                              | Composite score: 12~60                                                                                             |
|                             | (1) How do you evaluate your mental status?                                                                   | (1) 1= Very bad, 2= Quite bad, 3= Neither good nor bad, 4= Quite good, 5= Very good                                |
|                             | (2) How often do you have negative feelings such as blue mood or anxiety?                                     | (2) 1= Always, 2= Very often, 3= Sometimes, 4= Seldom, 5= Never                                                    |
|                             | (3) How often do you have insomnia?                                                                           | (3) 1= Always, 2= Very often, 3= Sometimes, 4= Seldom, 5= Never                                                    |
|                             | (4) How much do you enjoy life?                                                                               | (4) 1= Not at all, 2= A little, 3= A moderate amount, 4= Very much, 5= An extreme amount                           |
|                             | (5) To what extent do you feel your life to be meaningful?                                                    | (5) 1= Not at all, 2= A little, 3= A moderate amount, 4= Very much, 5= An extreme amount                           |
|                             | (6) How well are you able to concentrate?                                                                     | (6) 1= Not at all, 2= A little, 3= A moderate amount, 4= Very much, 5= An extreme amount                           |
|                             | (7) Do you have enough energy for everyday life?                                                              | (7) 1= Not at all, 2= A little, 3= A moderate amount, 4= Very much, 5= An extreme amount                           |
|                             | (8) How often do you worry about future life?                                                                 | (8) 1= Always, 2= Very often, 3= Sometimes, 4= Seldom, 5= Never                                                    |
|                             | (9) How often do you feel scared?                                                                             | (9) 1= Always, 2= Very often, 3= Sometimes, 4= Seldom, 5= Never                                                    |
|                             | (10) How much confidence do you have in your treatment?                                                       | (10) 1= Not at all, 2= A little, 3= A moderate amount, 4= Very much, 5= An extreme amount                          |
|                             | (11) How much hope do you have in your future life?                                                           | (11) 1= Hopeless, 2= Not quite hopeful, 3= Moderately hopeful, 4= Quite hopeful, 5= Full of hope                   |
|                             | (12) Are you satisfied with your current situation?                                                           | (12) 1= Very dissatisfied, 2= Dissatisfied, 3= Neither satisfied nor dissatisfied, 4= Satisfied, 5= Very satisfied |
| Dusty work                  | Years of engaging in dusty work; recorded as intervals from the five categorical options in the questionnaire | 2.5~22.5                                                                                                           |

|                                       |                                                                                                                                                                   |                                                                                                                                                 |
|---------------------------------------|-------------------------------------------------------------------------------------------------------------------------------------------------------------------|-------------------------------------------------------------------------------------------------------------------------------------------------|
| Stage of pneumoconiosis               | The pneumoconiosis is at which stage.                                                                                                                             | 0= Pneumoconiosis stage I, 1= Pneumoconiosis stage II, 2= Pneumoconiosis stage III, 3= Not sure about the stage                                 |
| Complications                         | Whether have complications                                                                                                                                        | 0= No complications, 1= At least one complication, 2= Not sure whether there are complications                                                  |
| Progression of pneumoconiosis stage   | Whether the pneumoconiosis stage increases                                                                                                                        | 0= No aggravation of pneumoconiosis stage, 1= Aggravation of pneumoconiosis stage, 2= Not sure whether pneumoconiosis stage aggravated          |
| Treatment expenditure                 | Expenditure on treatment of pneumoconiosis per year; recoded as intervals from the five categorical options in the questionnaire; naturally log-transformed       | 1800~ 21600.5; ln value: 7.496~9.980                                                                                                            |
| Current employment status             | Participants' current employment status                                                                                                                           | 0= Work inability, 1= Have work ability but unemployed, 2= Agricultural work, 3= Non-agricultural work, 4= Retired or other situations          |
| Household monthly income              | Objective socioeconomic status; recoded as intervals from the four categorical options in the questionnaire; naturally log-transformed                            | 750~ 3750.5; ln value: 6.620~ 8.230                                                                                                             |
| Self-rated family economic conditions | Subjective socioeconomic status                                                                                                                                   | 0= Very poor, often in debt, 1= Quite poor, needs careful calculation and strict budgeting, 2= Average, but meets basic expenses, 3= Quite good |
| Money from social security programs   | The amount of money obtained from social security programs; recoded as intervals from the six categorical options in the questionnaire; naturally log-transformed | 150~ 2250.5; ln value: 5.011~7.719                                                                                                              |
| <b>Exogenous variables</b>            |                                                                                                                                                                   |                                                                                                                                                 |
| Age                                   | The age of the participants                                                                                                                                       | 28~94                                                                                                                                           |
| Male                                  | The gender of the participants                                                                                                                                    | 0= Female, 1= Male                                                                                                                              |
| Married                               | The marital status of the participants                                                                                                                            | 0= Single, divorced, or widowed, 1= Married                                                                                                     |
| Han ethnicity                         | The ethnicity of the participants                                                                                                                                 | 0= Minority, 1= Han                                                                                                                             |
| Education level                       | The education level of the participants                                                                                                                           | 0= Primary school and below, 1= Middle school, 2= High school and above                                                                         |
| Urban hukou                           | Household registration ( <i>hukou</i> in Chinese) type                                                                                                            | 0= Rural hukou, 1= Urban hukou                                                                                                                  |
| Mining occupation                     | Occupational type                                                                                                                                                 | 0= Other relevant occupation, 1= Mining                                                                                                         |
| Urban area                            | Residence area                                                                                                                                                    | 0= Rural area, 1= Urban area                                                                                                                    |

### ***Robust Test Results***

The Akaike's Information Criteria (AIC) and Bayesian Information Criteria (BIC) of GSEM analysis without missing values were 28797.22 and 29631.36 respectively, while the AIC and BIC of GSEM analysis with missing values and different number of respondents in different paths were 29990.46 and 30836.09, respectively. Hence, the original models without missing values performed better. Models and without missing values (see Table 2) and with missing values (see Appendix Table S3) have similar results, proving that the results are generally robust.

**Table S3. Results of the GSEM Analysis (with missing values in different paths)**

|                                     | (1)<br>Dusty<br>work <sup>a</sup> | (2)<br>Stage of<br>pneumoconiosis<br><sup>b</sup> | (3)<br>Complications<br><sup>b</sup> | (4)<br>Progression of<br>pneumoconiosis<br>stage <sup>b</sup> | (5)<br>Treatment<br>expenditure<br><sup>a</sup> | (6)<br>Current<br>employment<br>status <sup>b</sup> | (7)<br>Household<br>monthly<br>income <sup>a</sup> | (8)<br>Self-rated<br>family<br>economic<br>conditions<br><sup>b</sup> | (9)<br>Psychological<br>well-being <sup>a</sup> |
|-------------------------------------|-----------------------------------|---------------------------------------------------|--------------------------------------|---------------------------------------------------------------|-------------------------------------------------|-----------------------------------------------------|----------------------------------------------------|-----------------------------------------------------------------------|-------------------------------------------------|
| Age                                 | 0.012                             | 0.986*                                            | 1.006                                | 0.987 <sup>!</sup>                                            | −0.013***                                       | 1.003                                               | 0.008***                                           | 1.047***                                                              | −0.011                                          |
| Male                                | 2.185                             | 0.668                                             | 0.471                                | 0.196**                                                       | −0.366                                          | 0.228*                                              | 0.301 <sup>!</sup>                                 | 0.442                                                                 | 1.071                                           |
| Married                             | 1.770*                            | 0.571*                                            | 1.171                                | 0.760                                                         | −0.124                                          | 1.433                                               | 0.191*                                             | 0.918                                                                 | 0.348                                           |
| Han Ethnicity                       | −1.562                            | 0.283**                                           | 0.716                                | 0.243***                                                      | −0.039                                          | 0.743                                               | −0.125                                             | 1.257                                                                 | −0.176                                          |
| Education level                     |                                   |                                                   |                                      |                                                               |                                                 |                                                     |                                                    |                                                                       |                                                 |
| Middle                              | −0.780*                           | 0.924                                             | 1.057                                | 1.237 <sup>!</sup>                                            | −0.049                                          | 0.871                                               | 0.046                                              | 0.937                                                                 | 0.814*                                          |
| High and<br>above                   | −0.859                            | 0.670                                             | 0.876                                | 1.048                                                         | 0.074                                           | 0.513*                                              | 0.230**                                            | 2.200**                                                               | 0.808                                           |
| Urban hukou                         | 7.602***                          | 0.867                                             | 0.726                                | 1.198                                                         | −0.416*                                         | 6.572***                                            | 0.070                                              | 1.031                                                                 | 1.242                                           |
| Mining work                         | 3.004***                          | 1.421 <sup>!</sup>                                | 1.196                                | 2.570***                                                      | −0.176 <sup>!</sup>                             | 0.879                                               | −0.104 <sup>!</sup>                                | 0.661 <sup>!</sup>                                                    | −1.376*                                         |
| Urban area                          | 3.188**                           | 0.269***                                          | 0.990                                | 0.584                                                         | −0.212                                          | 13.329***                                           | 0.187                                              | 1.009                                                                 | −0.401                                          |
| Stage of pneumoconiosis             |                                   |                                                   |                                      |                                                               |                                                 |                                                     |                                                    |                                                                       |                                                 |
| Stage II                            |                                   |                                                   |                                      |                                                               | 0.035                                           | 0.850                                               | −0.002                                             | 0.711*                                                                | 0.514                                           |
| Stage III                           |                                   |                                                   |                                      |                                                               | 0.399***                                        | 0.275***                                            | 0.010                                              | 0.627*                                                                | −0.992                                          |
| Not sure                            |                                   |                                                   |                                      |                                                               | 0.113                                           | 0.690 <sup>!</sup>                                  | 0.044                                              | 0.557**                                                               | 1.399*                                          |
| Complications                       |                                   |                                                   |                                      |                                                               |                                                 |                                                     |                                                    |                                                                       |                                                 |
| At least one                        |                                   |                                                   |                                      |                                                               | 0.243***                                        | 0.515***                                            | −0.051                                             | 0.994                                                                 | −1.270**                                        |
| Not sure                            |                                   |                                                   |                                      |                                                               | 0.183*                                          | 0.827                                               | −0.067                                             | 0.820                                                                 | −0.750                                          |
| Progression of pneumoconiosis stage |                                   |                                                   |                                      |                                                               |                                                 |                                                     |                                                    |                                                                       |                                                 |
| Aggravation                         |                                   |                                                   |                                      |                                                               | 0.109                                           | 1.134                                               | 0.052                                              | 1.379 <sup>!</sup>                                                    | −1.466**                                        |
| Not sure                            |                                   |                                                   |                                      |                                                               | −0.037                                          | 1.154                                               | −0.081 <sup>!</sup>                                | 1.019                                                                 | −2.351***                                       |
| Dusty work                          |                                   | 1.090***                                          | 1.032**                              | 1.024*                                                        | 0.033***                                        | 1.049***                                            | 0.000 <sup>c</sup>                                 | 0.942***                                                              | −0.017                                          |
| Treatment expenditure (ln value)    |                                   |                                                   |                                      |                                                               |                                                 |                                                     | −0.063**                                           | 0.636***                                                              | −0.444 <sup>!</sup>                             |
| Current employment status           |                                   |                                                   |                                      |                                                               |                                                 |                                                     |                                                    |                                                                       |                                                 |
| Have work ability but unemployed    |                                   |                                                   |                                      |                                                               |                                                 |                                                     | −0.203 <sup>!</sup>                                | 1.692                                                                 | −2.599*                                         |
| Agricultural                        |                                   |                                                   |                                      |                                                               |                                                 |                                                     | 0.131**                                            | 1.596**                                                               | 1.154*                                          |
| Non-agricultural                    |                                   |                                                   |                                      |                                                               |                                                 |                                                     | 0.354***                                           | 2.758***                                                              | 2.333***                                        |
| Retired or other                    |                                   |                                                   |                                      |                                                               |                                                 |                                                     | 0.343***                                           | 3.448***                                                              | 0.918                                           |

|                                                |                    |      |      |      |          |          |           |
|------------------------------------------------|--------------------|------|------|------|----------|----------|-----------|
| Money from social security programs (ln value) |                    |      |      |      | 0.083*** | 1.350*** | 0.195     |
| Household monthly income (ln value)            |                    |      |      |      |          |          | 0.398     |
| Self-rated family economic conditions          |                    |      |      |      |          |          |           |
| Quite poor, needs careful calculation          |                    |      |      |      |          |          | 2.205***  |
| Average, but meets basic expenses              |                    |      |      |      |          |          | 5.436***  |
| Quite good                                     |                    |      |      |      |          |          | 8.333***  |
| _cons                                          | 4.426 <sup>†</sup> |      |      |      | 9.328*** | 6.476*** | 30.434*** |
| N                                              | 1134               | 1134 | 1134 | 1134 | 1059     | 1134     | 1059      |

Note: <sup>a</sup> For Paths (1), (5), (7), and (9), the effect measure is b.

<sup>b</sup> For Paths (2), (3), (4), (6) and (8), the effect measure is OR.

<sup>c</sup> 0.0003876

<sup>†</sup> p < 0.1, \* p < 0.05, \*\* p < 0.01, \*\*\* p < 0.001

GSEM results reported unstandardized coefficients.
